# Supplementary figures and images for: Persistent activity in a recurrent circuit underlies courtship memory in Drosophila
Source: eLife journal article supplement (doi:10.7554/elife.31425), 2018-01-11

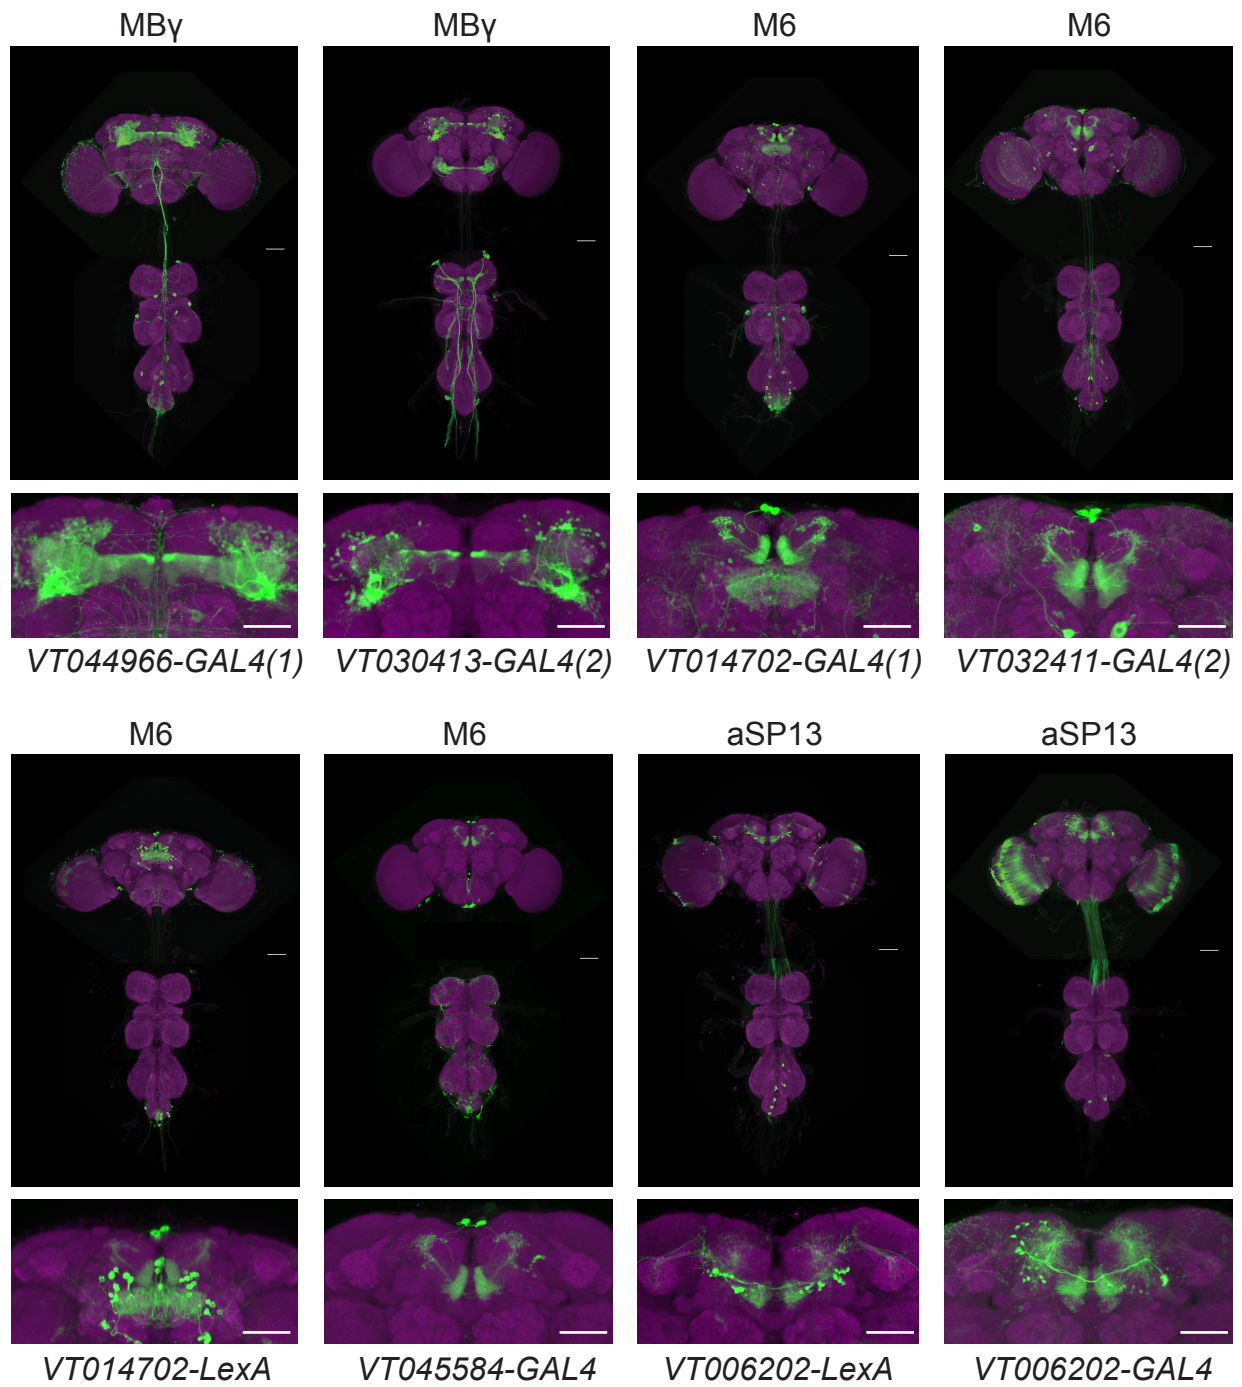

Figure 1 - Figure Supplement 1

Supplement: supp [file elife_poa_e31425_Figure_1_figure_supplement_1.pdf › elife_poa_e31425_Figure_1_figure_supplement_1.pdf]

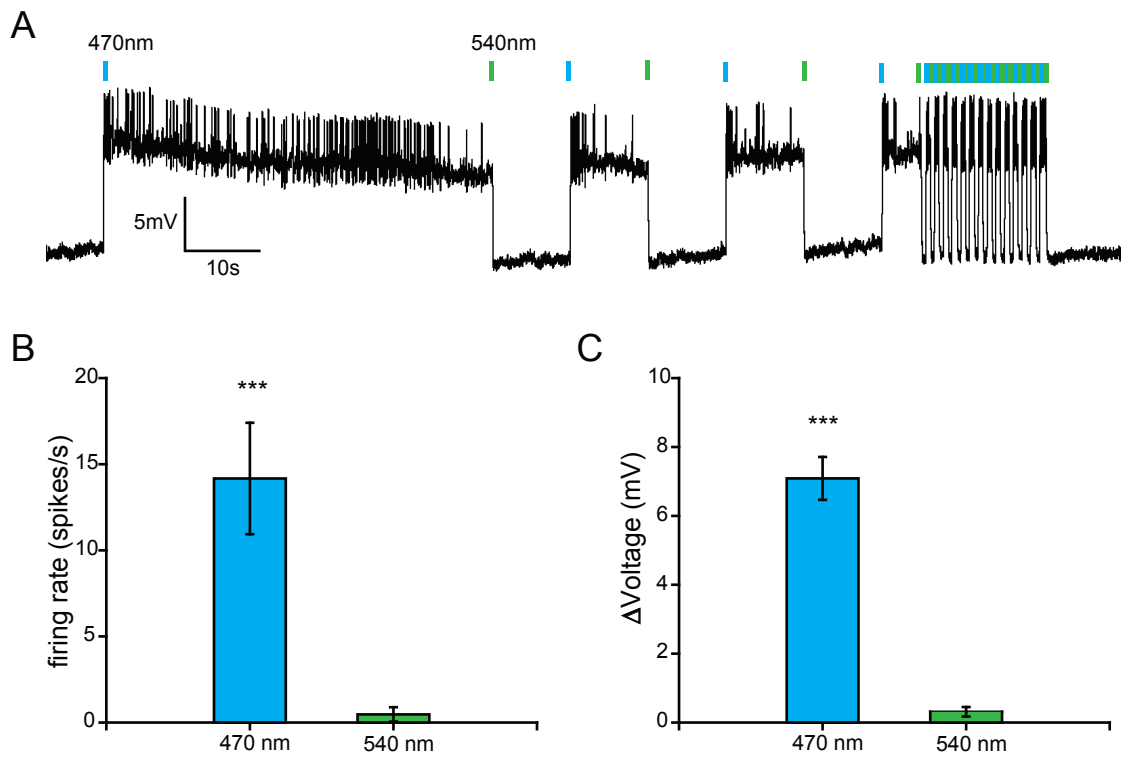

Figure 2 - Figure Supplement 1

Supplement: supp [file elife_poa_e31425_Figure_2_figure_supplement_1.pdf › elife_poa_e31425_Figure_2_figure_supplement_1.pdf]

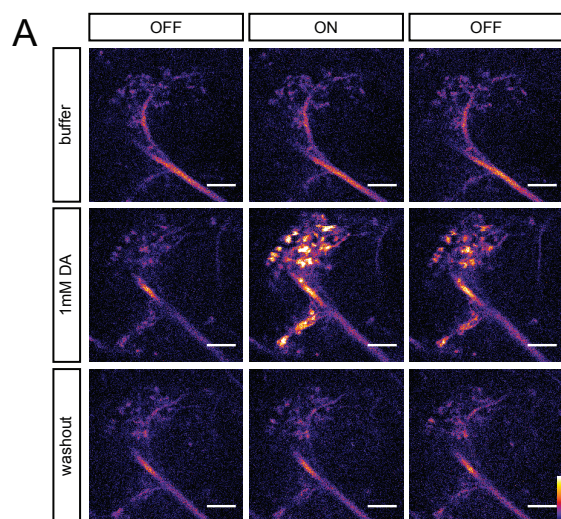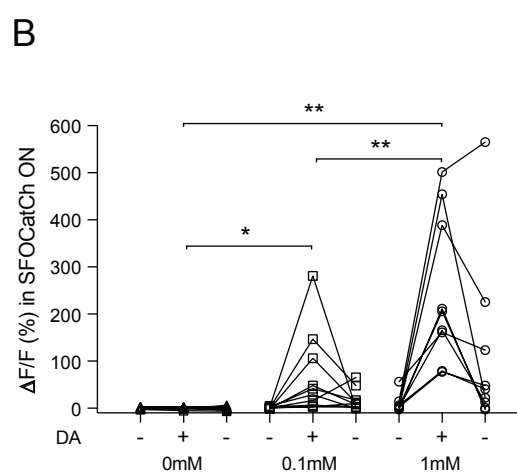

Figure 2 - Figure Supplement 2

Supplement: supp [file elife_poa_e31425_Figure_2_figure_supplement_2.pdf › elife_poa_e31425_Figure_2_figure_supplement_2.pdf]

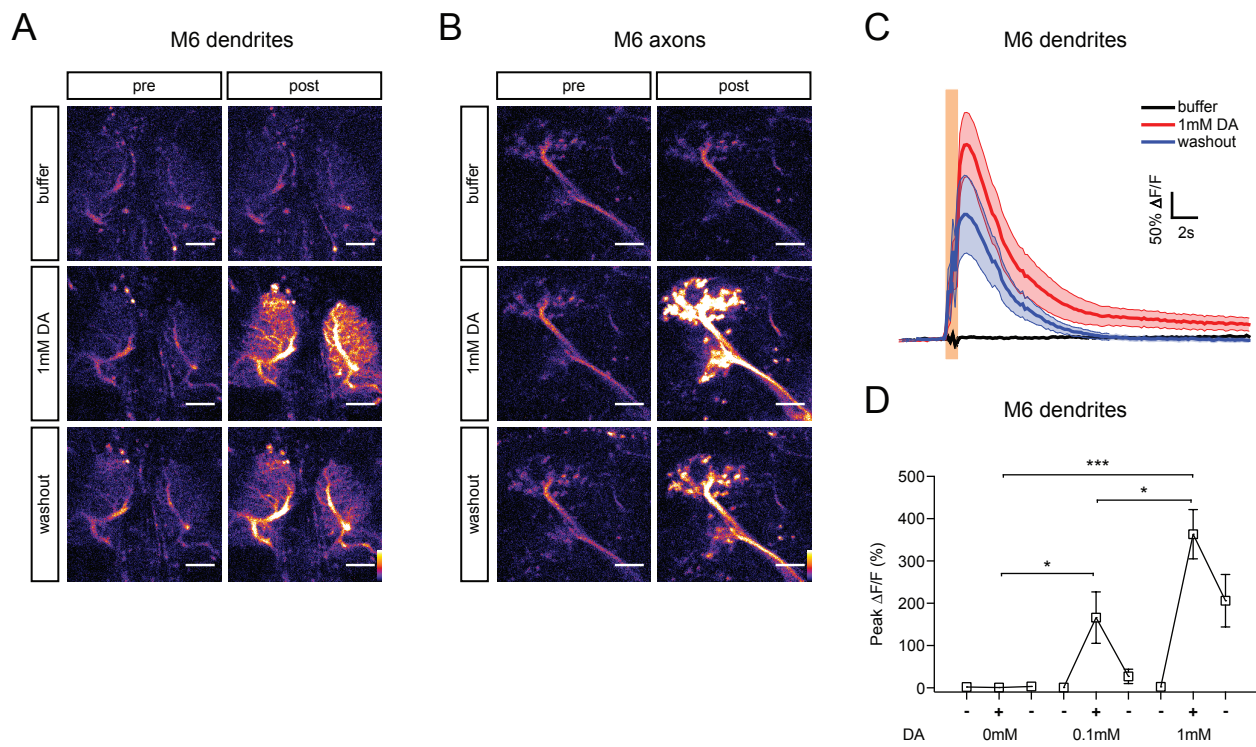

Figure 2 - Figure Supplement 3

Supplement: supp [file elife_poa_e31425_Figure_2_figure_supplement_3.pdf › elife_poa_e31425_Figure_2_figure_supplement_3.pdf]

A

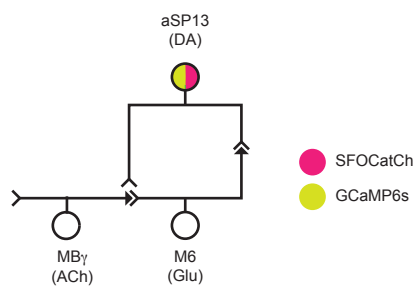

B

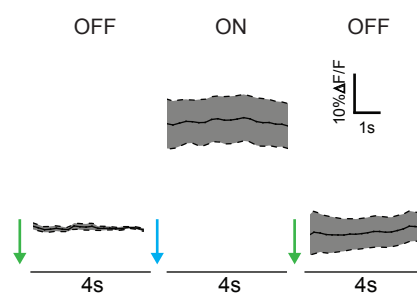

Figure 4 - Figure Supplement 1

Supplement: supp [file elife_poa_e31425_Figure_4_figure_supplement_1.pdf › elife_poa_e31425_Figure_4_figure_supplement_1.pdf]

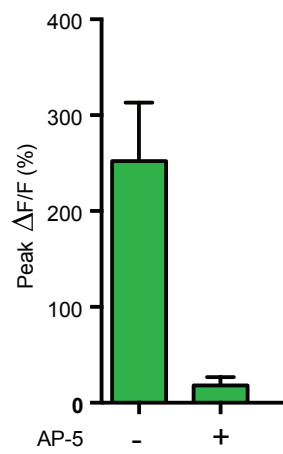

Figure 4 - Figure Supplement 2

Supplement: supp [file elife_poa_e31425_Figure_4_figure_supplement_2.pdf › elife_poa_e31425_Figure_4_figure_supplement_2.pdf]

A

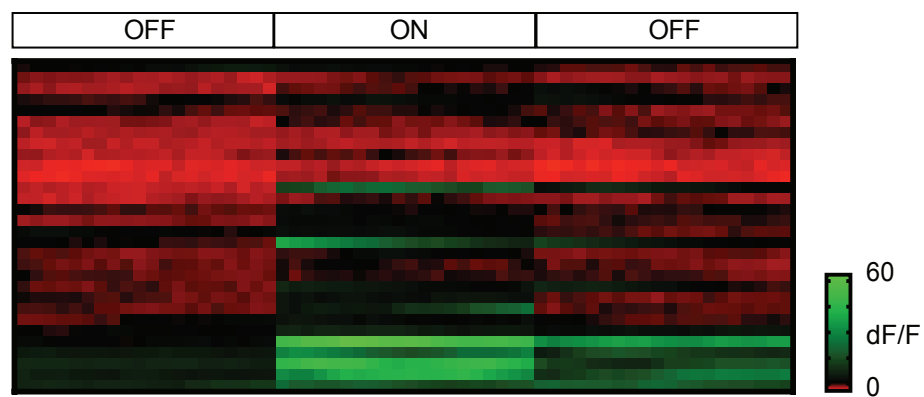

B

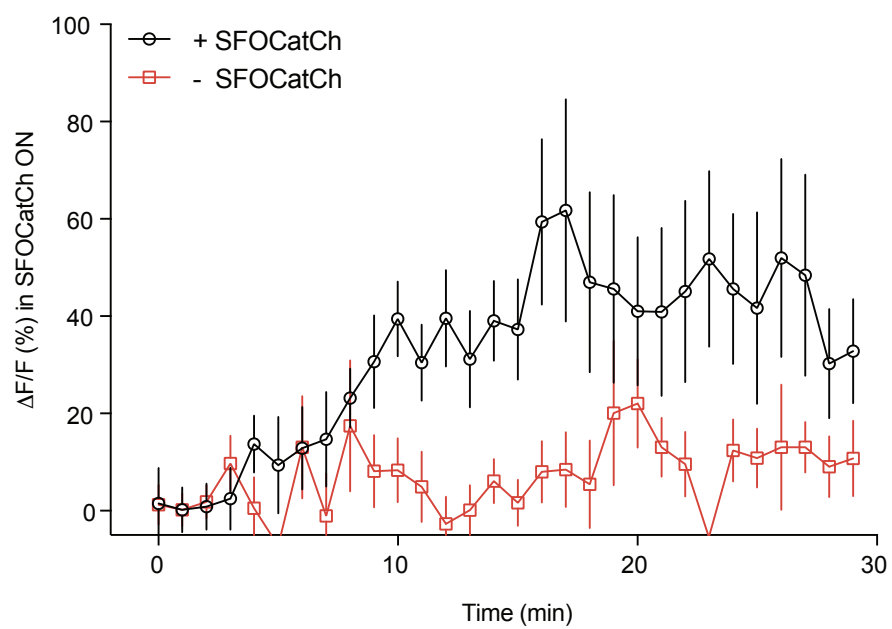

Figure 4 - Figure Supplement 3

Supplement: supp [file elife_poa_e31425_Figure_4_figure_supplement_3.pdf › elife_poa_e31425_Figure_4_figure_supplement_3.pdf]
